# Supplementary material
Source: MDPI journal article supplement (https://www.mdpi.com/2673-9976/4/1/102)

## **Abstract:**

Currently, the world is facing a high population increase as well as climate change involving global warming, water shortage which limits agronomic productivity, necessary to achieve food security for the growing population. As sessile organisms unable to run away from danger, plants are endowed with sophisticated mechanisms to overcome all stressing situations for survival, involving an enormous amount of chemical molecules, specific for each situation. In addition, they establish intimate relationships with beneficial microorganisms creating the plant microbiome. Within this microbiome are beneficial bacteria, known as Plant Growth Promoting Rhizobacteria (PGPR), which represent a great tool to boost plant fitness in different aspects, as they are able to trigger multiple targets simultaneously.

The present work describes the physiological mechanisms involved in plant adaptation to water stress, nutrient absorption, and adaptative responses to biotic stress and how bioeffectors are able to modulate these responses, focusing on the mechanisms involved in plant adaptation to water stress (salinity and water shortage), plant innate immunity and general mechanisms involved in plant protection to pathogen outbreaks. A few examples in *Solanum lycopersicum*, *Olea europea* and *Rubus* sp illustrate effects of PGPR increasing plant adaptative capacity

**Keywords:** beneficial bacteria, adaptation, water stress, food security

# THE SCENARIO

The world population is expected to triple between 1950 (2.5 billion) and 2050 (10 billion)

Thomas Malthus, *Essay on the Principle of Population* (1798)

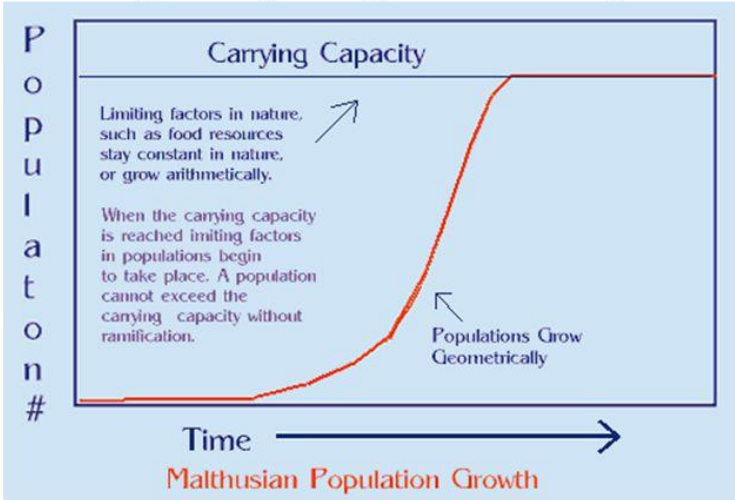

The rate of human population growth is greater than the rate of increase of food supply --> will lead to famine

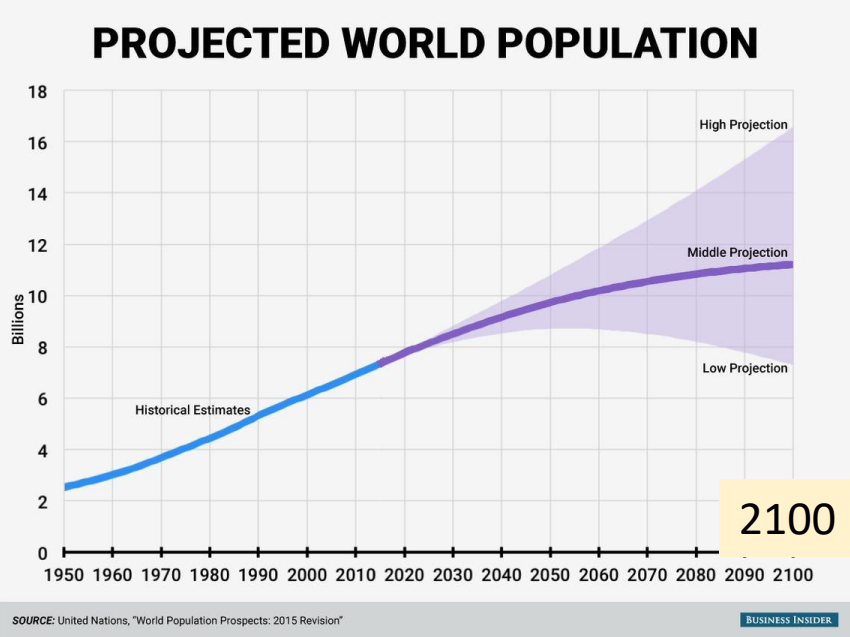

Globally, more than **one billion** people per year are chronically hungry

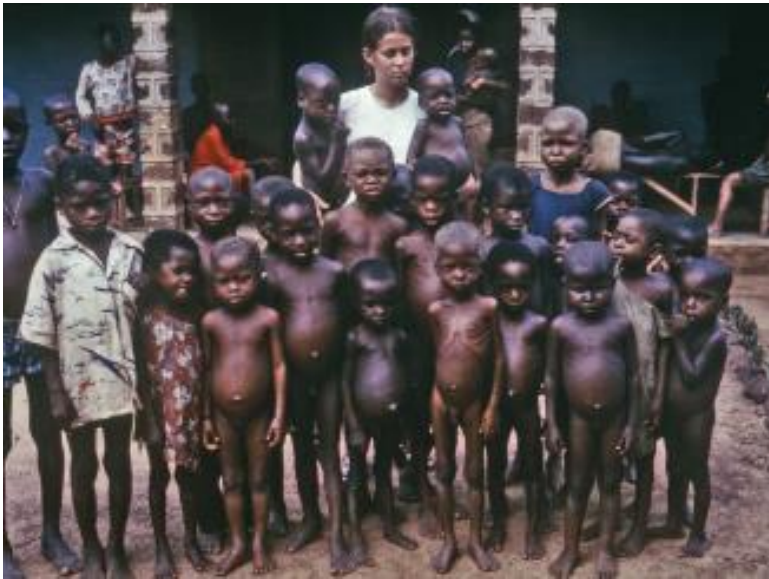

More than *two billion* people per year are chronically anemic due to iron deficiency

Image courtesy CDC/ Dr. Lyle Conrad (number 6901) Image courtesy CDC (number 6903)

Scarcity of foods is not the only problem.....

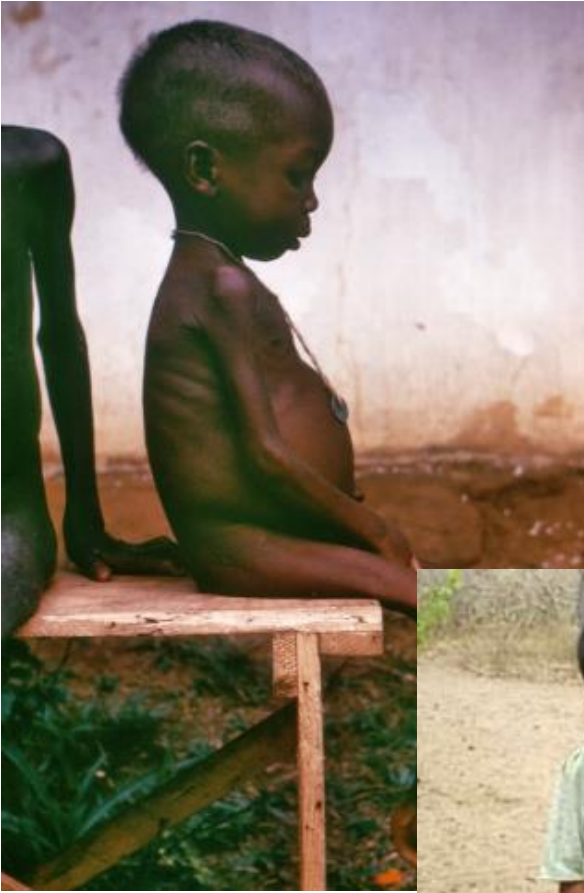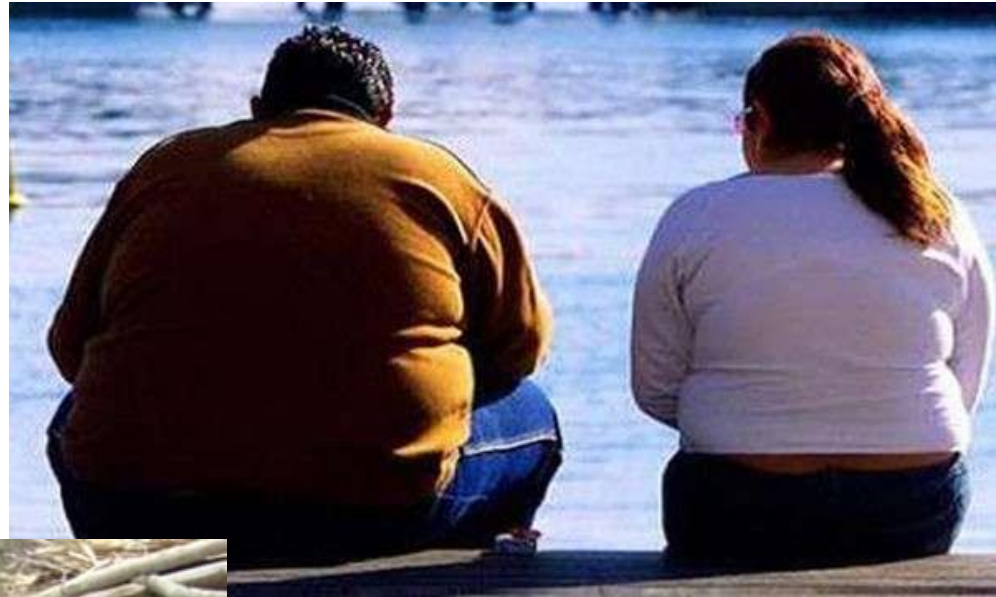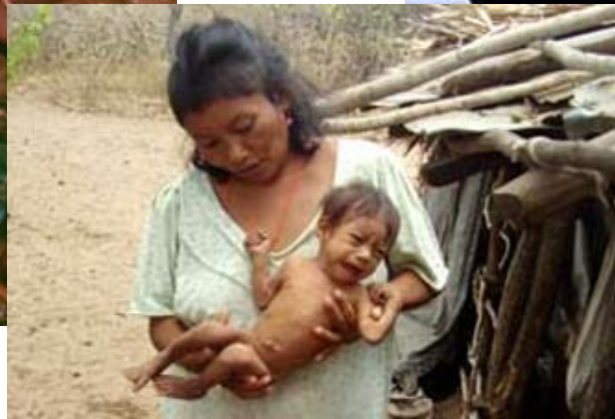

# GLOBAL WARMING

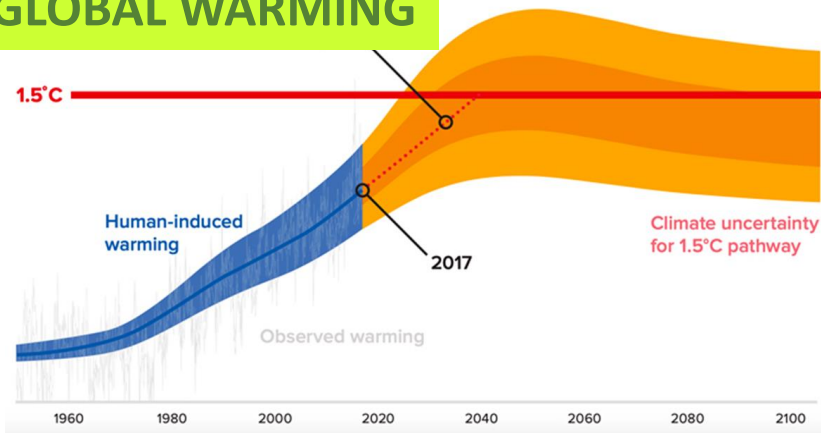

# CLIMATE CHANGE

WATER AVAILABILITY LIMITED  
SALINITY  
ARID SOILS

## Mapping the Impacts of Climate Change

### EXTREME WEATHER

Direct Risks

Overall Vulnerability

### SEA LEVEL RISE

Direct Risks

Overall Vulnerability

### AGRICULTURAL PRODUCTIVITY LOSS

Direct Risks

Overall Vulnerability

### OVERALL VULNERABILITY

Direct Risks

Overall Vulnerability

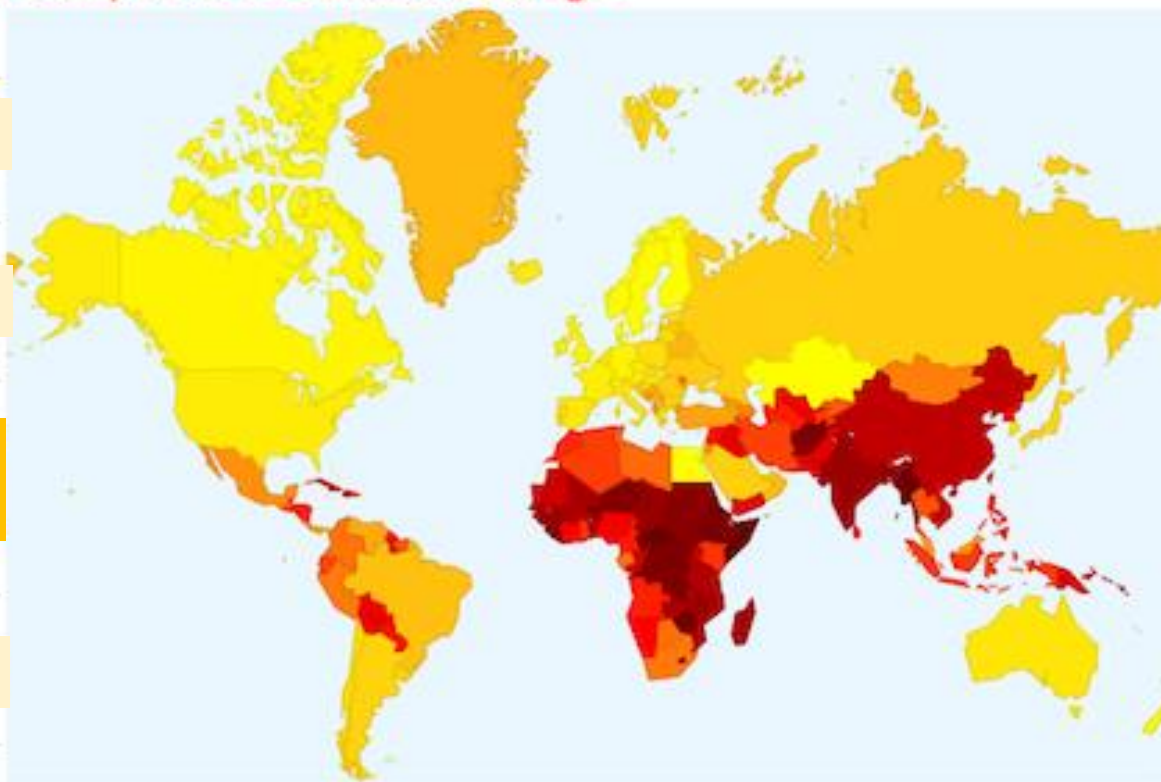

Rank 1 169

Overall Overall Vulnerability:  
Physical Impacts Adjusted For Coping Ability

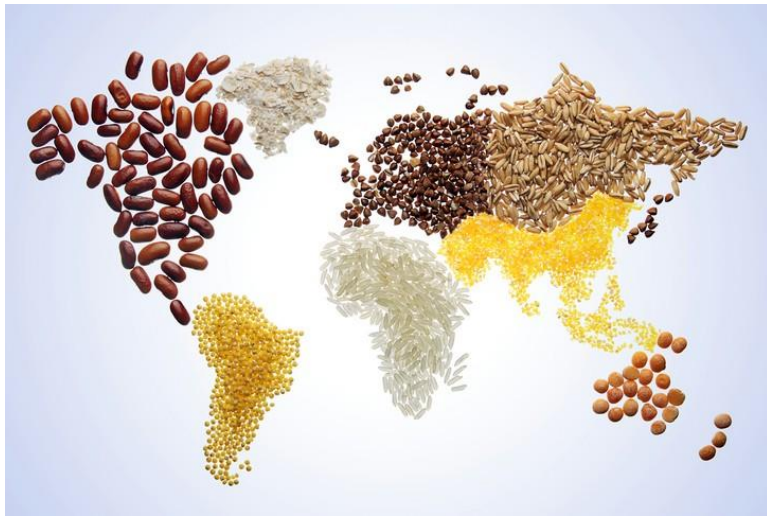

## THE CHALLENGE

### Food security

Food security exists when all people, at all times, have physical and economic access to sufficient, safe and **nutritious** food to meet their dietary needs and food preferences for an active and **healthy** life. (FAO)

## SUSTAINABILITY

A major objective of plant science is to increase food production; current estimates indicate that we need to increase production by 70% in the next 40 years.

**ENOUGH**

**HEALTHY  
NUTRITIOUS**

LESS DEVELOPED COUNTRIES

# MILESTONES IN BIOTECHNOLOGY ENABLING POPULATION GROWTH

INCREASES IN GLOBAL POPULATION ALWAYS ASSOCIATED TO AN INCREASED CAPACITY TO PRODUCE FOOD

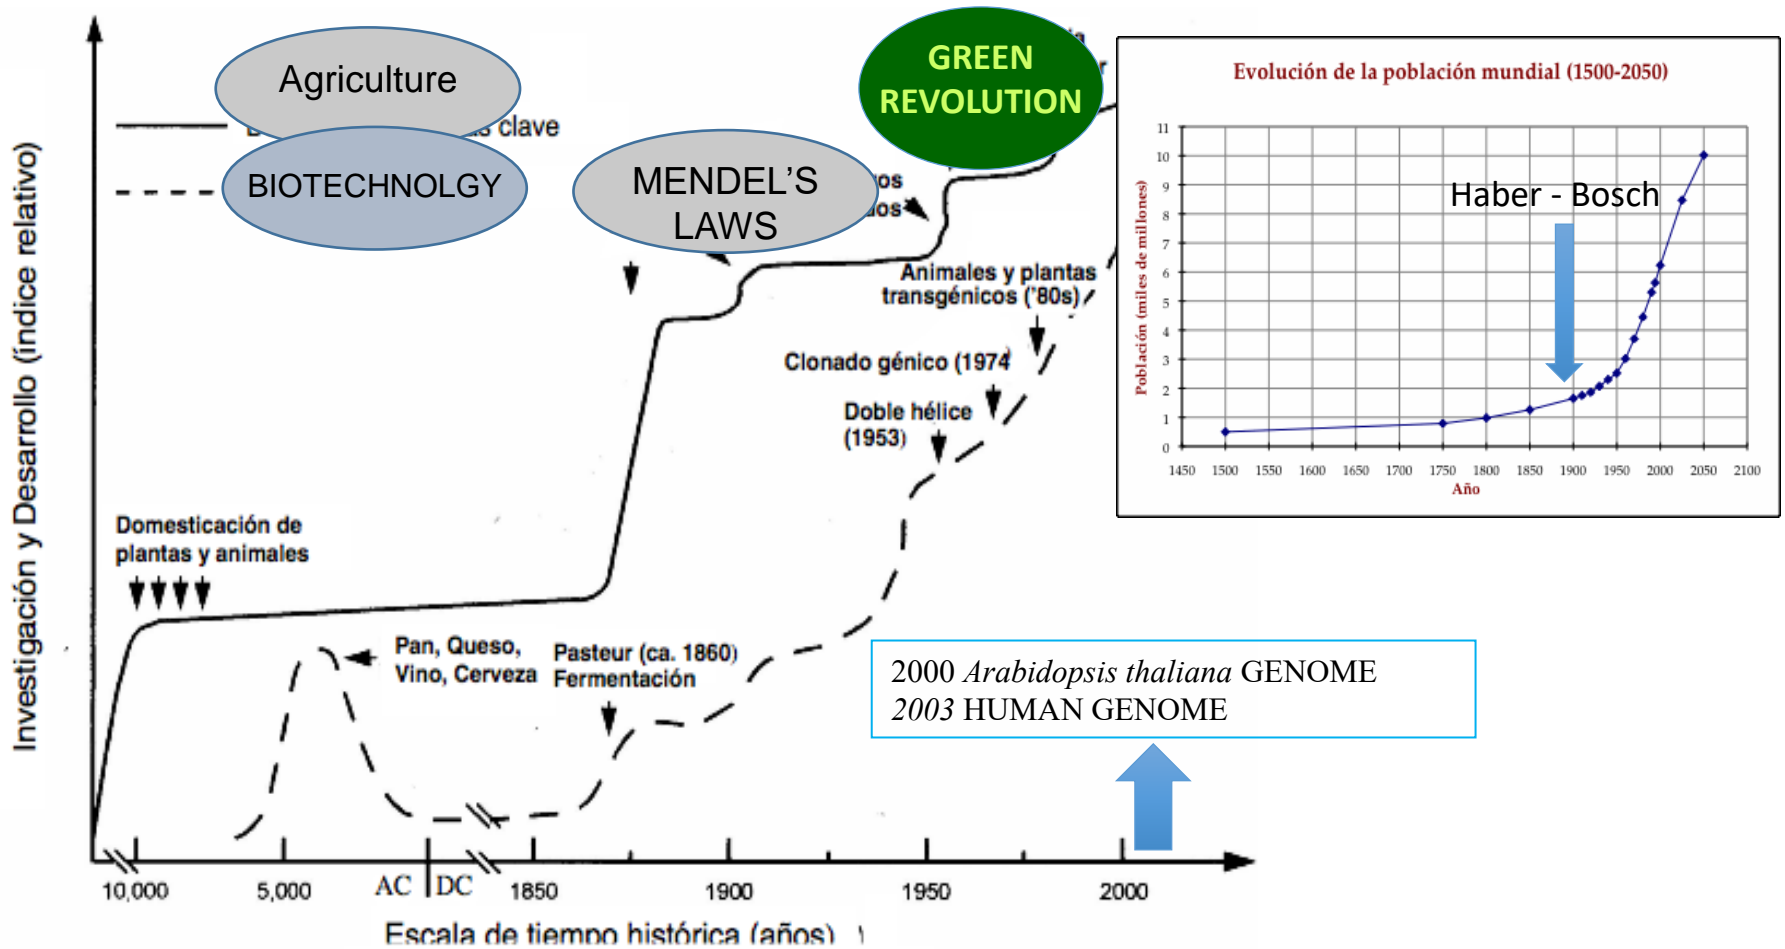



**GREEN REVOLUTION**

**Fertilizers**

**Seeds**

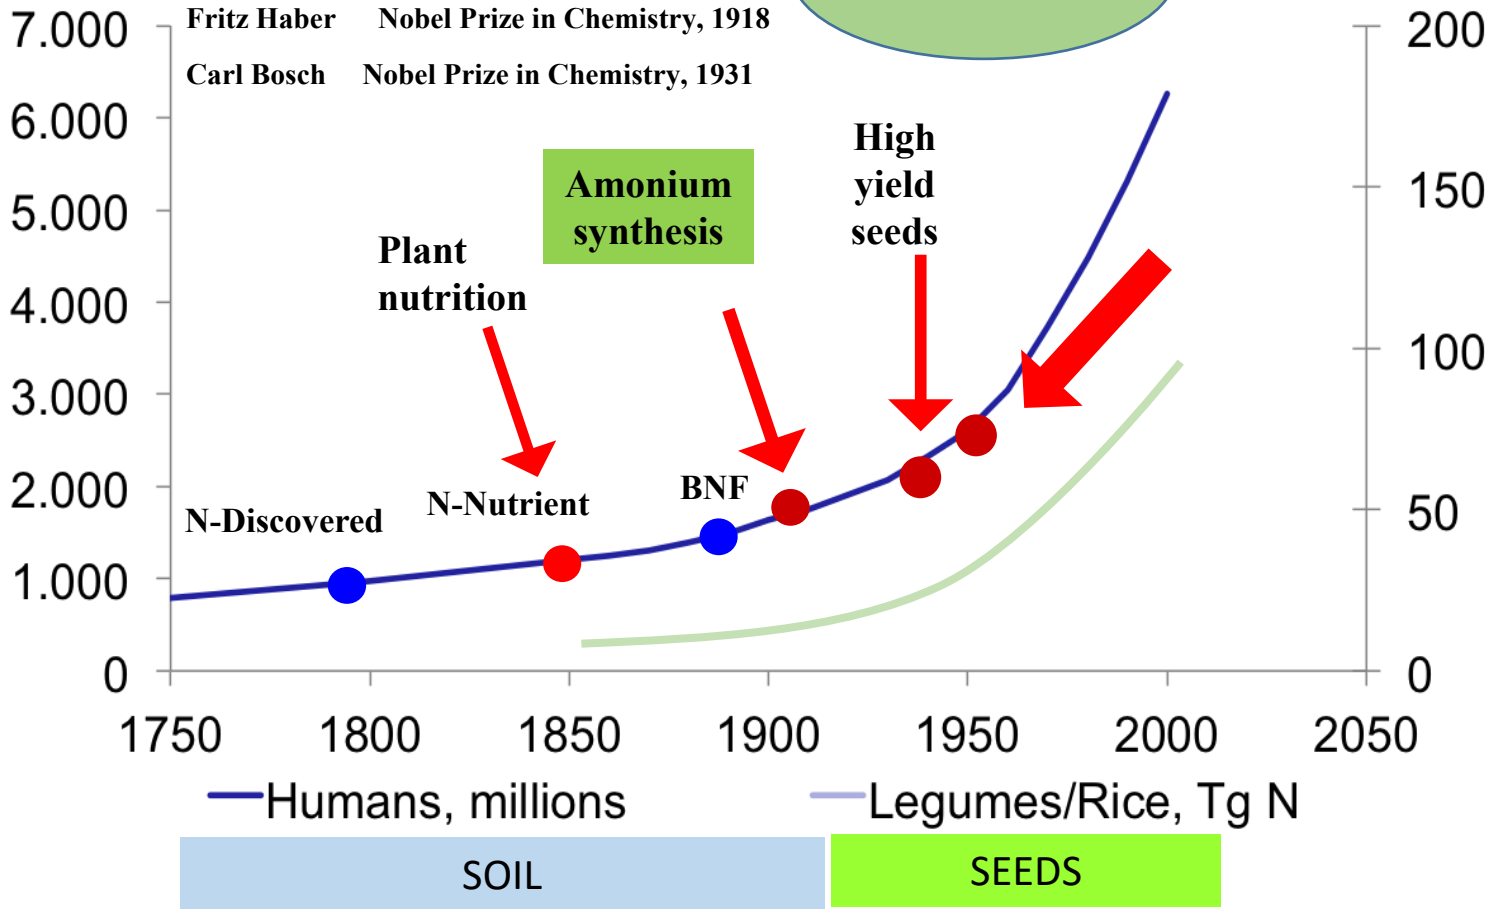

After a long period of strict abiotic concept of agriculture .....

**WHAT'S NEXT?**

**WHAT'S  
NEXT?**



**MICROORGANISMS  
THE BIOTIC COMPONENT ON THE MOVE:  
PLANT MICROBIOME**

**SOIL IS A COMPLEX SYSTEM, AN ECOSYSTEM  
HOLDS AN ENORMOUS DIVERSITY OF ORGANISMS  
MICROORGANISMS ESTABLISH COMPLEX INTERACTIONS  
AMONG THEM  
AND  
WITH THE PLANTS THAT LIVE THEREIN**

**DIFFERENT SOILS, DIFFERENT PROBLEMS,  
DIFFERENT MICROBIOMES**

- **Microbial density: above  $10^{11}$  per gram of soil.**
- **Highest diversity: more than  $10^4$  different species per gram of soil**

A MILESTONE IN THE BIOTIC COMPONENT OF THE SOIL

**THE  
PLANT-MICROBE  
INTERACTION**

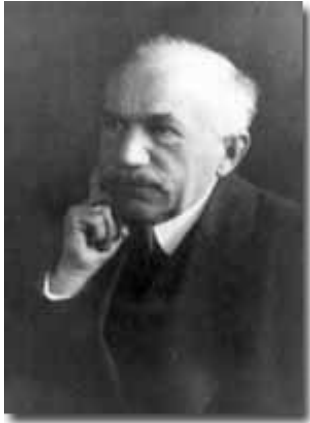

Lorentz Hiltner (1904)

**THE RIZOSPHERE**

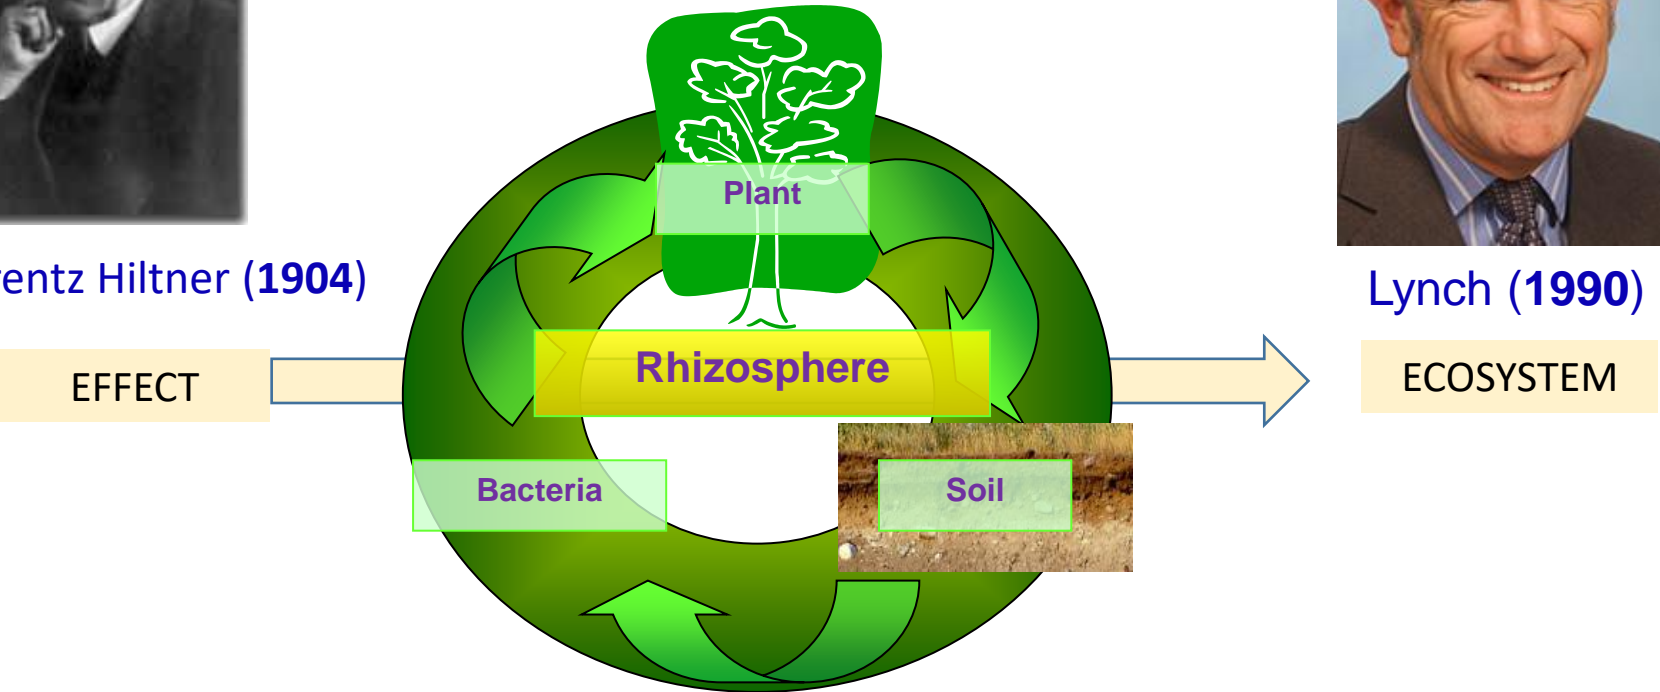

EFFECT

ECOSYSTEM

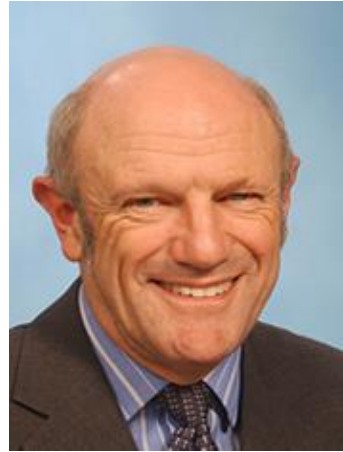

Lynch (1990)

**MICROORGANISMS**

**SOIL**

**PLANTS**

**PHOTOSYNTHESIS**

ENERGY INPUT

**MICROBIOME SELECTION**

**AERIAL  
PLANT  
PATHOGENS**

**COMMENSALISTS,  
no direct effect on  
plant pathogen**

Exudates

**SOIL PLANT  
PATHOGENS**

**SELECTION**

**BENEFICIAL  
MICROORGANISMS**

Microcolonies  
of bacteria

The complexity  
of soil

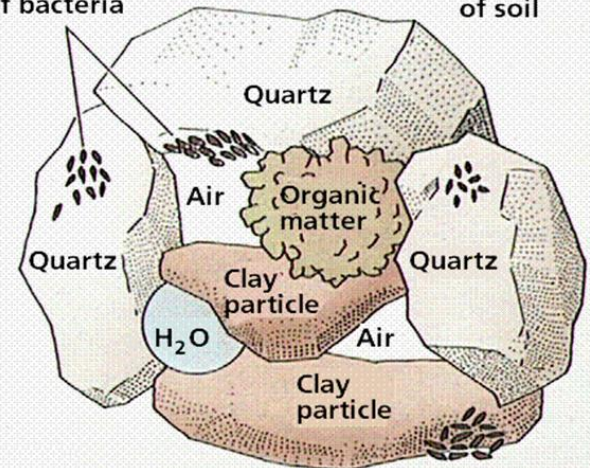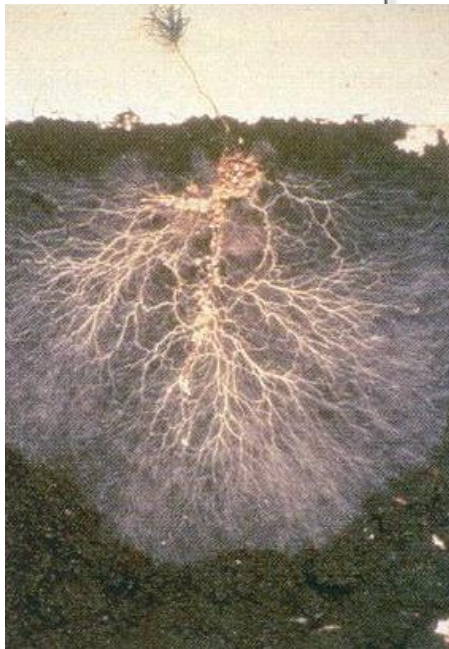

# HOW DO MICROBES IMPROVE PLANT FITNESS?

## A) INVOLVING PLANT METABOLISM

Metabolic changes are triggered in roots and appear in leaves  
**SYSTEMIC RESPONSE**

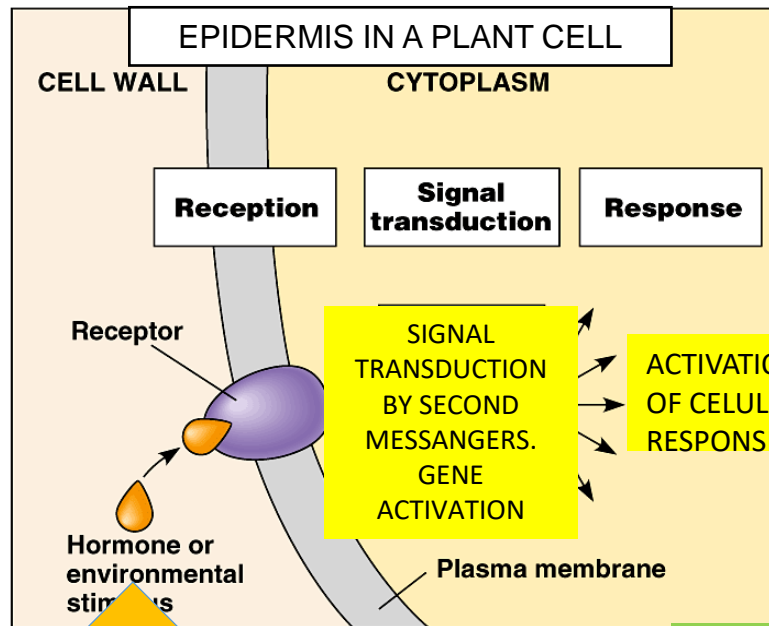

Copyright © Pearson Education, Inc., publishing as Benjamin Cummings.

## SECONDARY METABOLISM

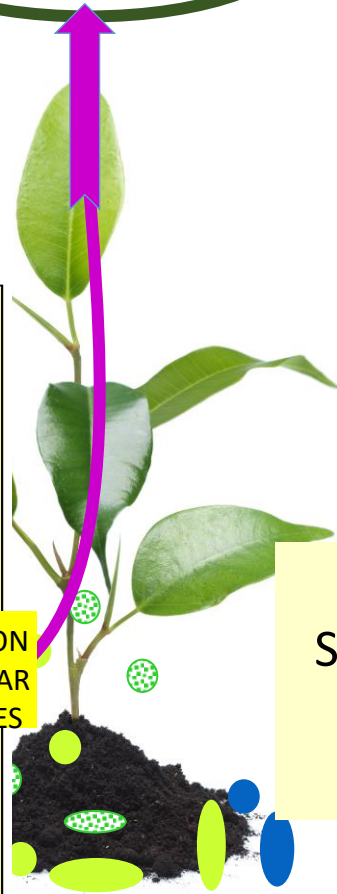

## B) AFFECTING EXTERNAL FACTORS:

Nutrient mobilization  
Control of other microorganisms....

MULTIPLE MECHANISMS  
SIMULTANEOUSLY TRIGGERED  
BY BENEFICIAL  
MICROORGANISMS

[Ilangumaran, G.](#) and [D.L. Smith.](#) 2017. Plant Growth Promoting Rhizobacteria in Amelioration of Salinity Stress: A Systems Biology Perspective. *Front. Plant Sci.*, 23 <https://doi.org/10.3389/fpls.2017.01768>

ELICITOR: A MOLECULE RELEASED BY BACTERIA

MICROBIOME

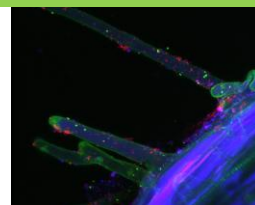

**Biotechnological Applications of Bioeffectors Derived From The Plant Microbiome to Improve Plant's Physiological Response for a Better Adaptation to Biotic and Abiotic Stress. Fundamentals and Case Studies.** García-Villaraco, et al, 2021, in TAYLOR AND FRANCIS (in press)

**HOW DO MICROBES IMPROVE PLANT FITNESS?**

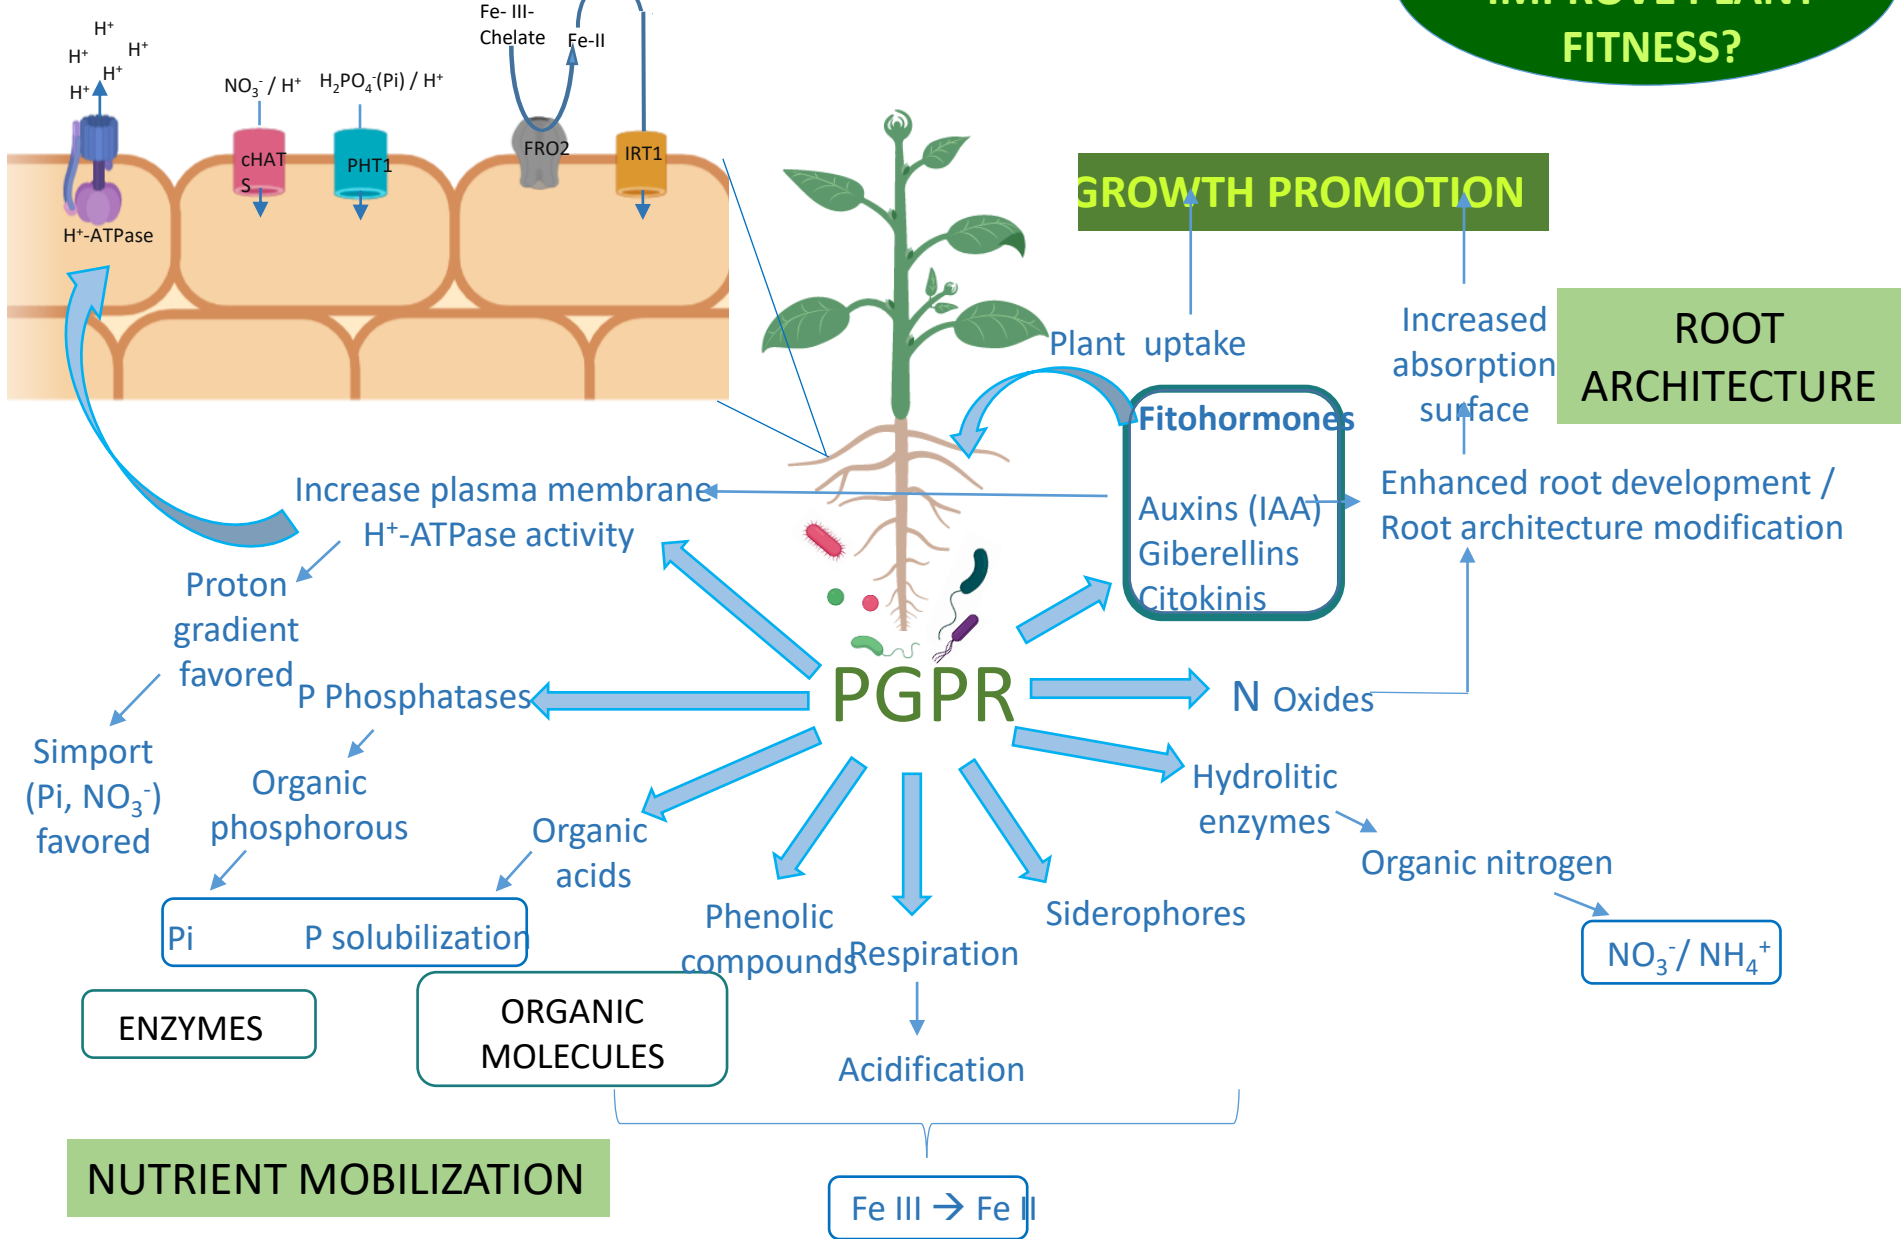

**PLANT DEFENSE  
BIOTIC STRESS**

**HOW DO MICROBES  
IMPROVE PLANT  
FITNESS?**

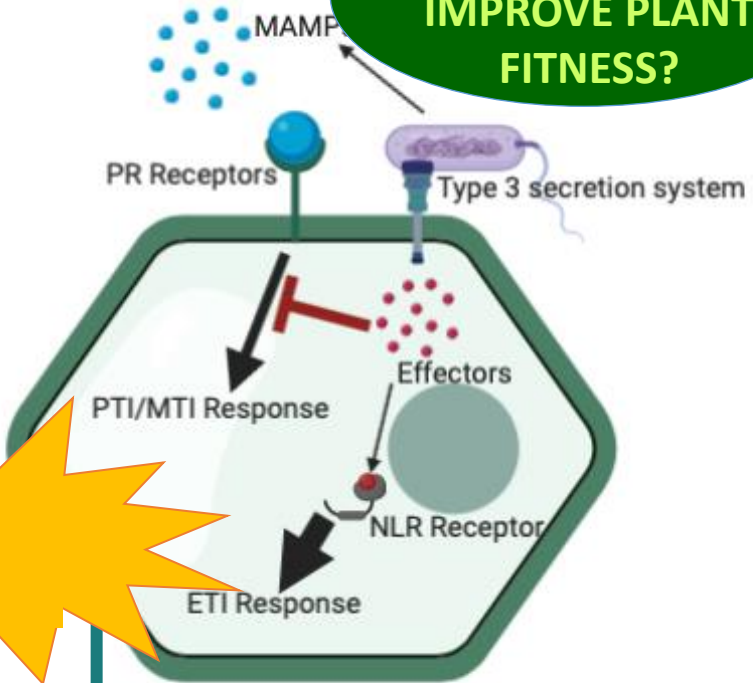

**Intracellular Signal molecules (SA, JA/Et)**

**Genetic expression changes**

**Defense Molecules (PRs, PDFs, Phytoalexins)**

**Systemic Signal molecules (MeSA, PiP, etc.)**

**ROS**

**SYSTEMIC  
RESPONSE**

PTI: PATHOGEN TRIGGERED IMMUNITY  
ETI: EFFECTOR TRIGGERED IMMUNITY

# BEYOND PLANT DEFENSE

# HOW DO MICROBES IMPROVE PLANT FITNESS?

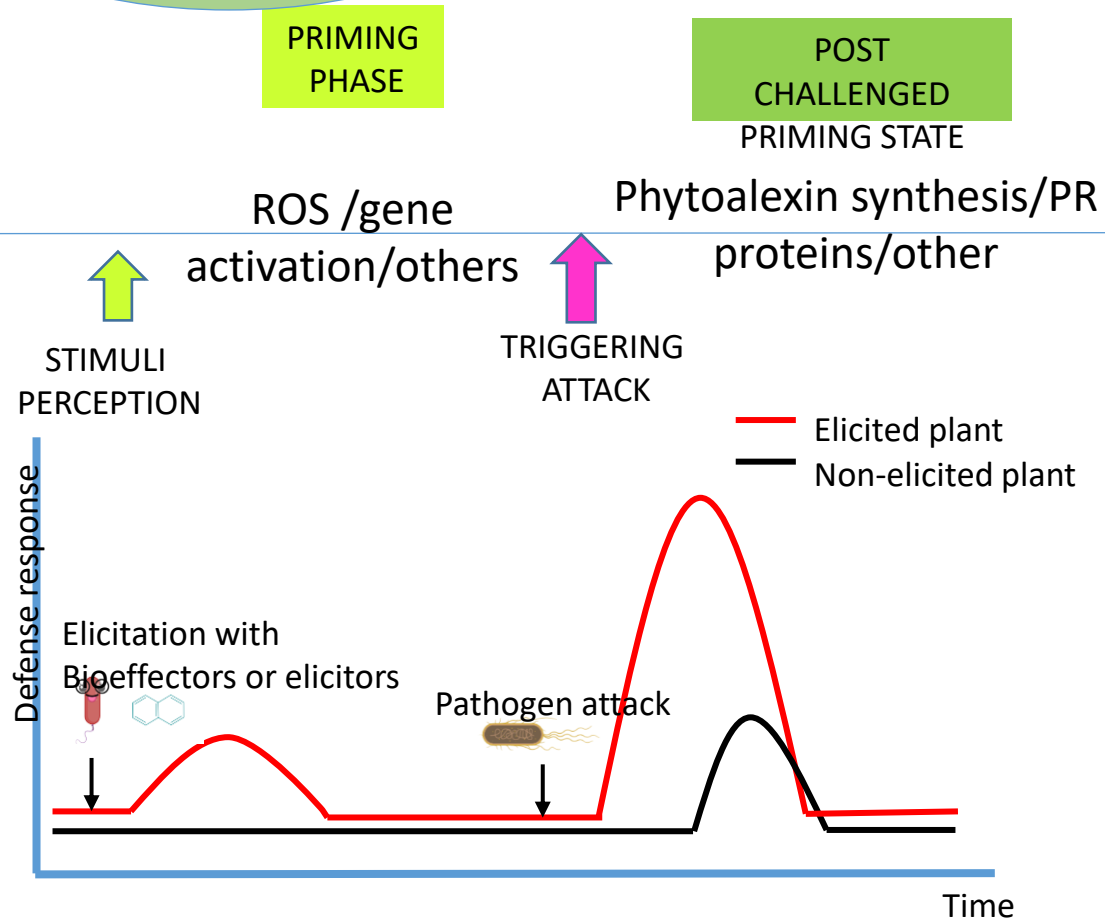

**MORE ROBUST DEFENSE**

**HIGHER QUALITY OF PLANT FOODS DUE TO MORE BIOACTIVES (SECONDARY METABOLISM)**

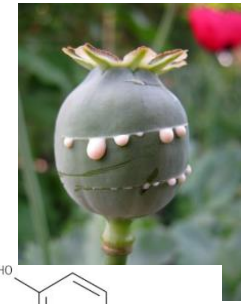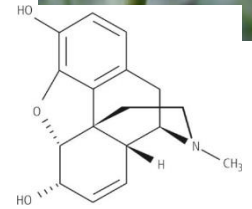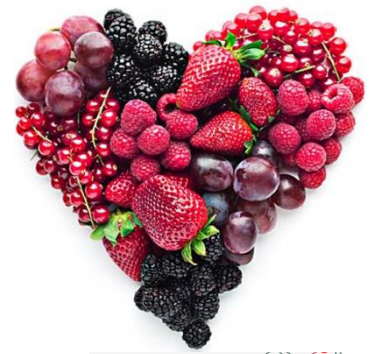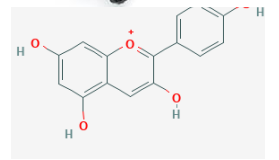



# ABIOTIC STRESS (DROUGHT / SALINITY)

## PLANT MECHANISMS FOR ADAPTATION TO WATER STRESS

# HOW DO MICROBES IMPROVE PLANT FITNESS?

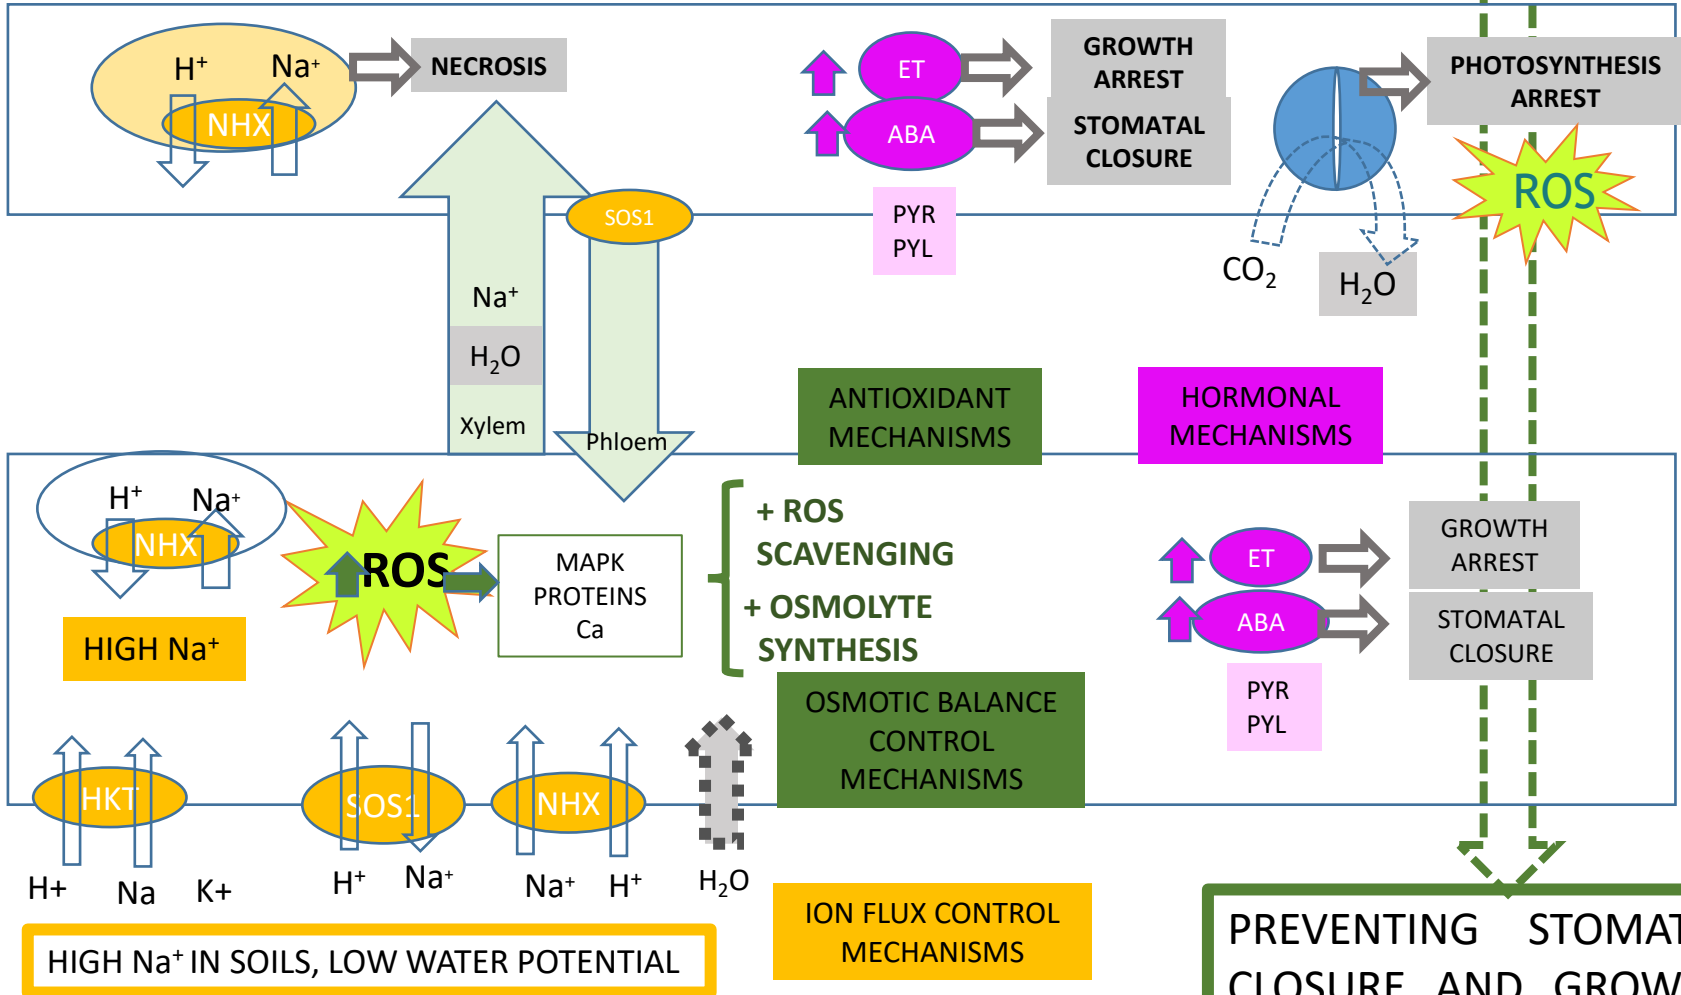

PREVENTING STOMATAL CLOSURE AND GROWTH ARREST, TARGETTING ANY OF THESE POINTS

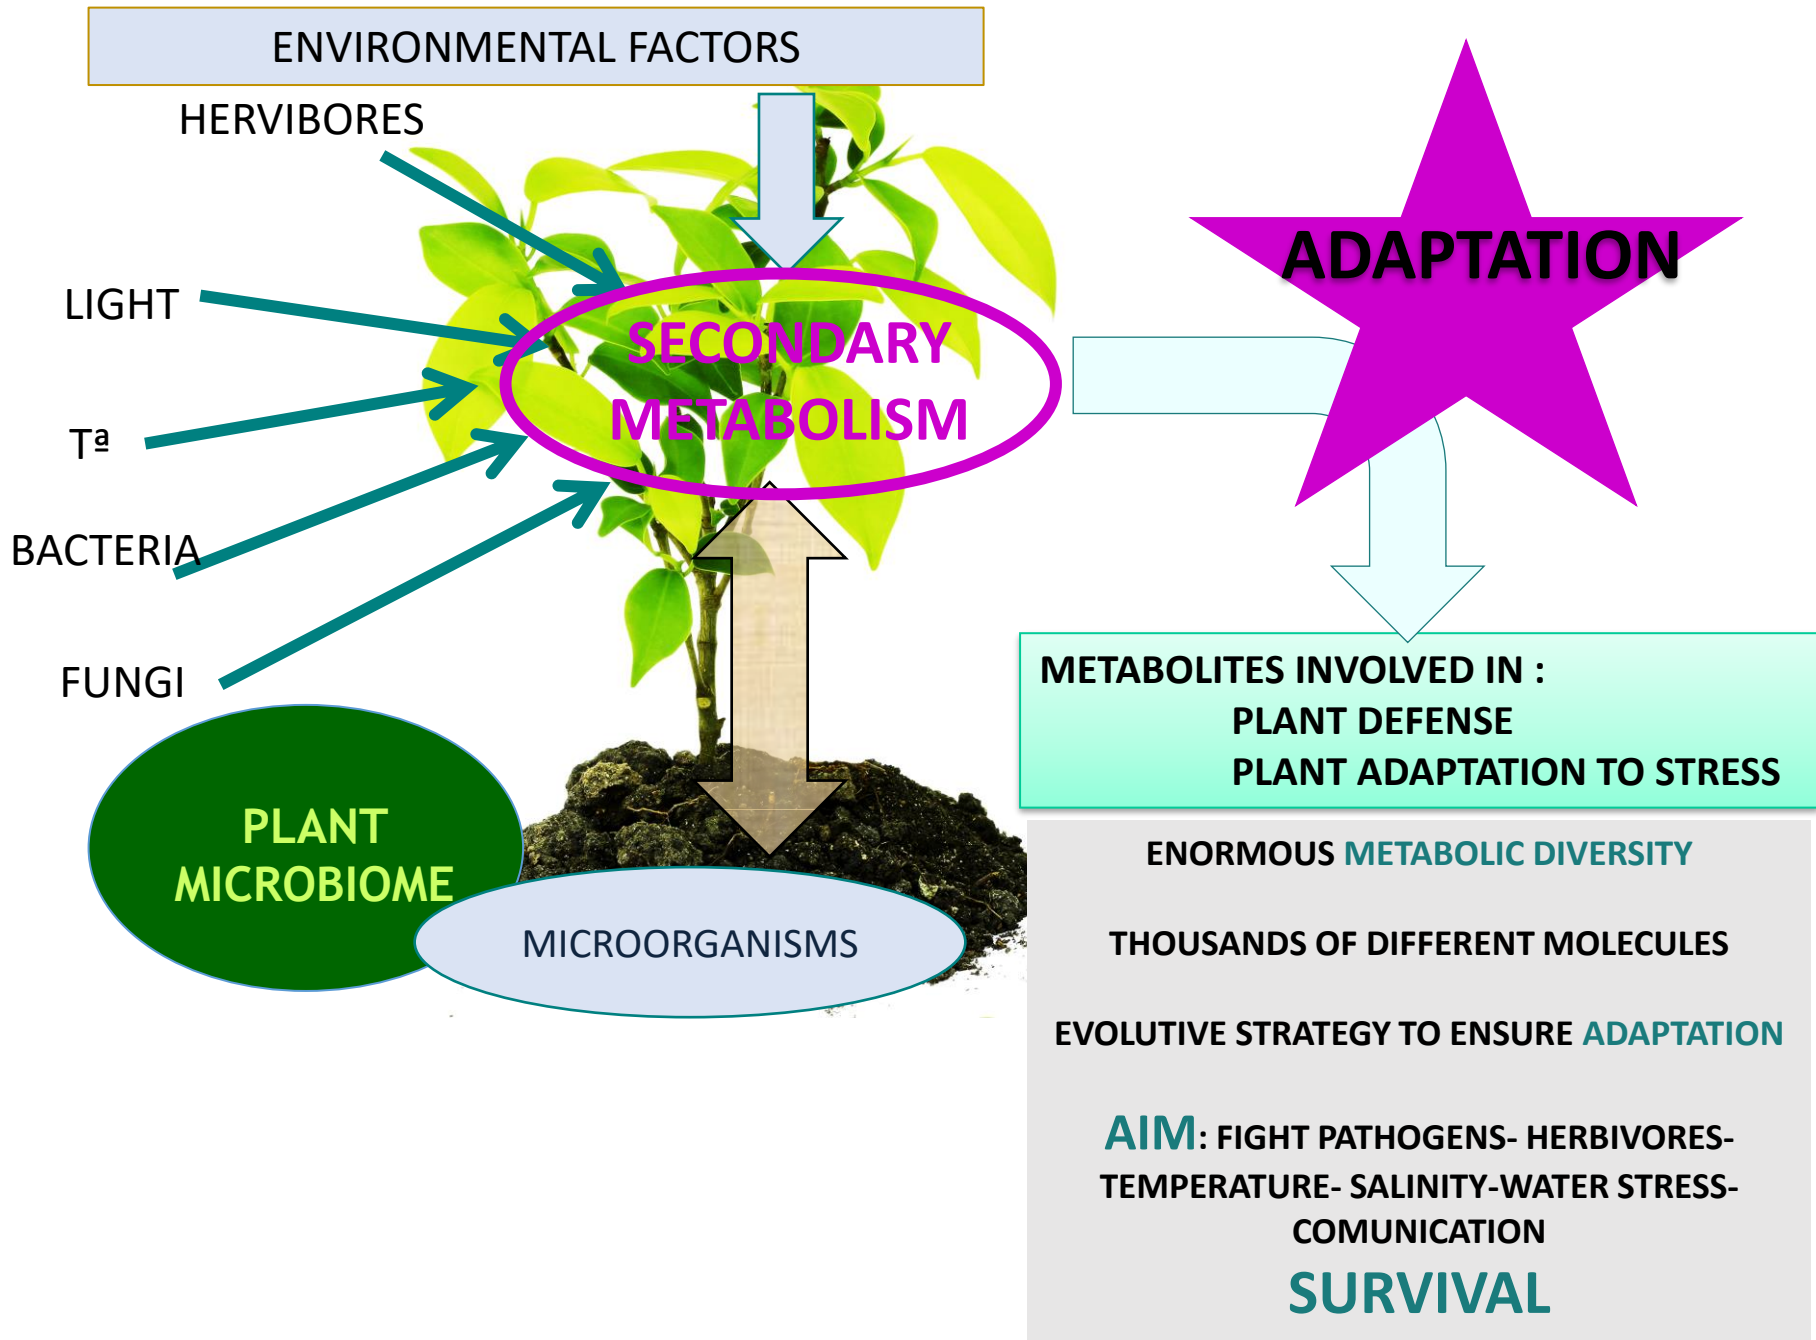

# AGRONOMIC GOALS

## HOW DO MICROBES IMPROVE PLANT FITNESS?

### MANIPULATING PLANT PHYSIOLOGY TO

- Lower water and fertilizer demand
- Improve nutrient content
- Improve drought tolerance
- Improve tolerance to other stresses
- Enhance pathogen resistance

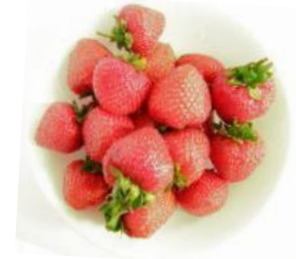

A) GENETIC MANIPULATION  
SINGLE TARGETS

B) BENEFICIAL MICROORGANISMS :  
MULTIPLE TARGETS

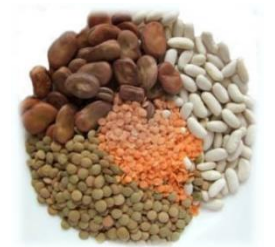

PGPB / ELICITORS

OLEA EUROPEA

DECREASE IN WATER INPUT (-25%)

LOWER WATER DEMAND (BY 25%)

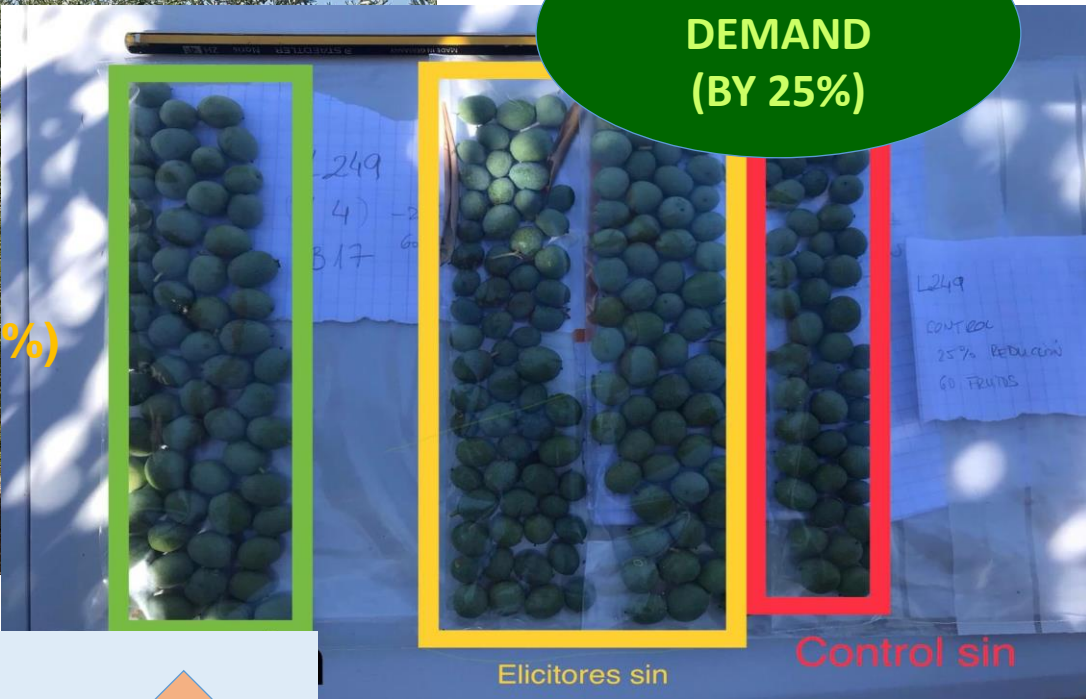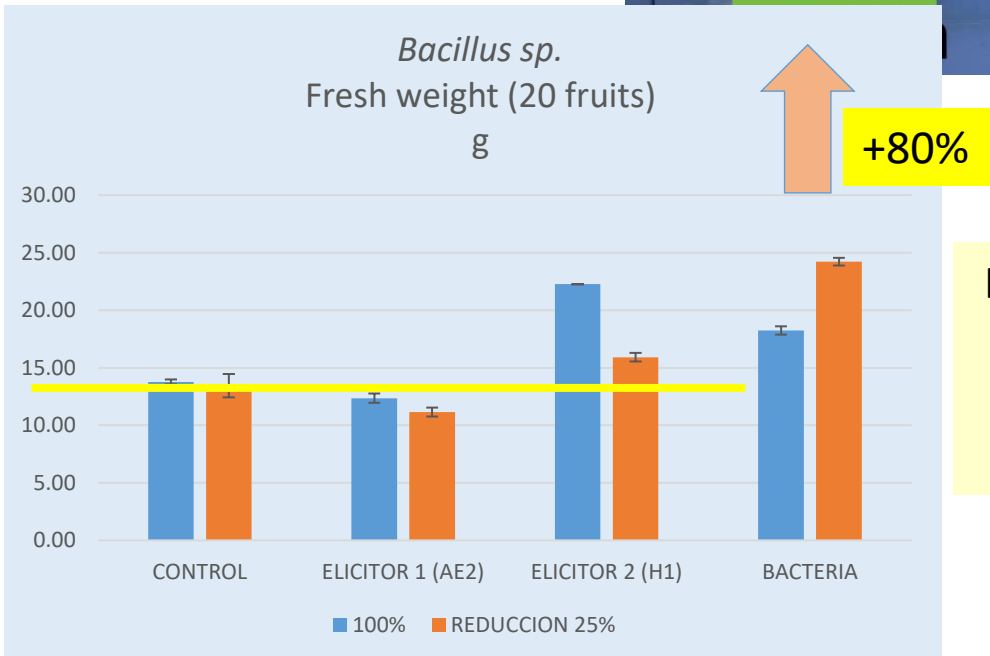

INCREASED HARVEST YIELD UP TO 20% ON WATER LIMITED PLANTS

ENHANCED C FIXATION

**LOWERING CHEMICAL INPUTS  
IMPROVING NUTRIENT CONTENTS IN TOMATO (Fe)**

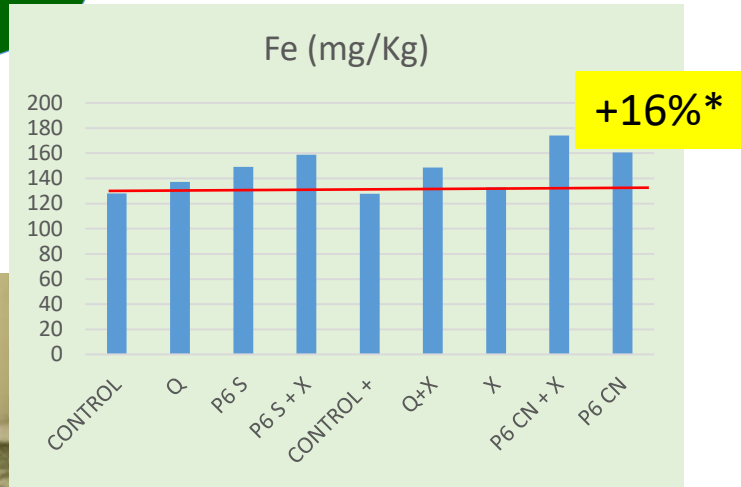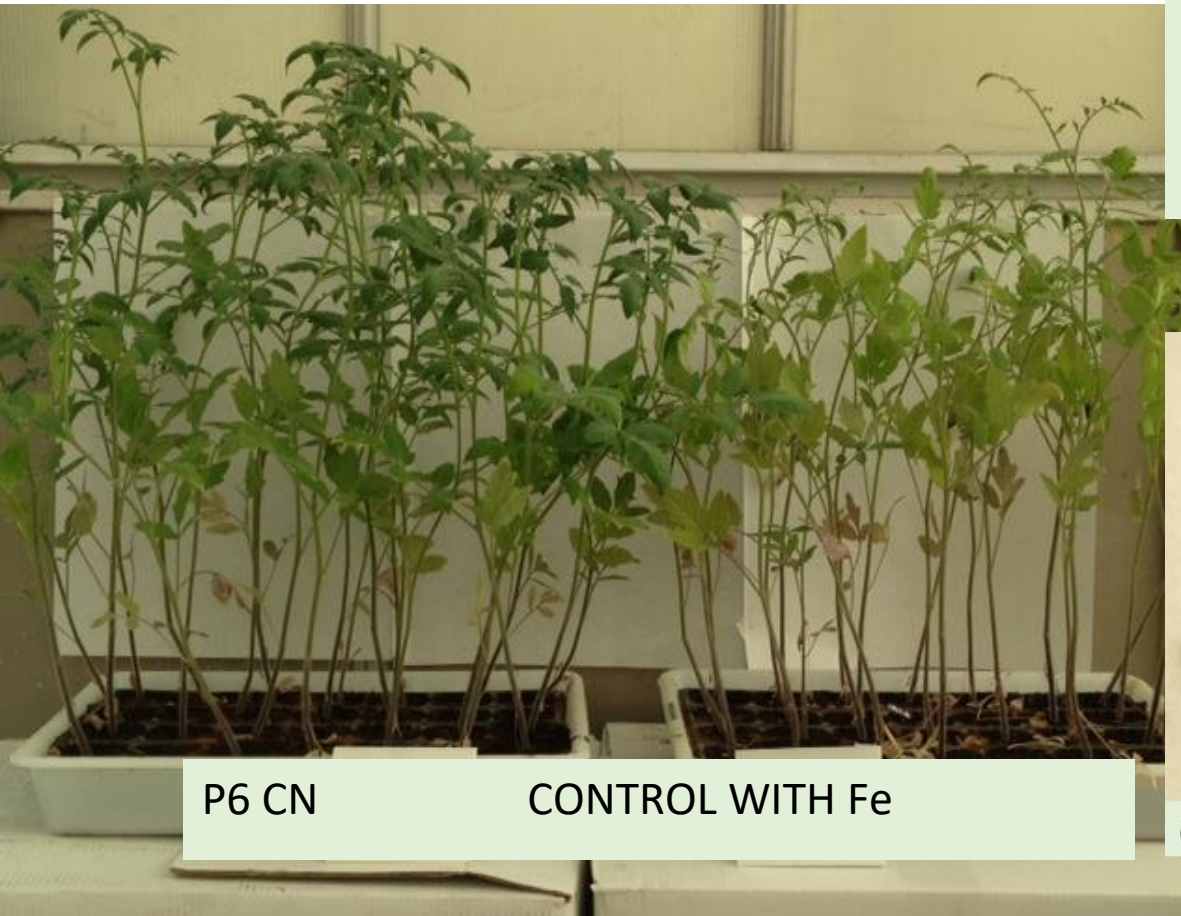

*Pseudomonas sp.*

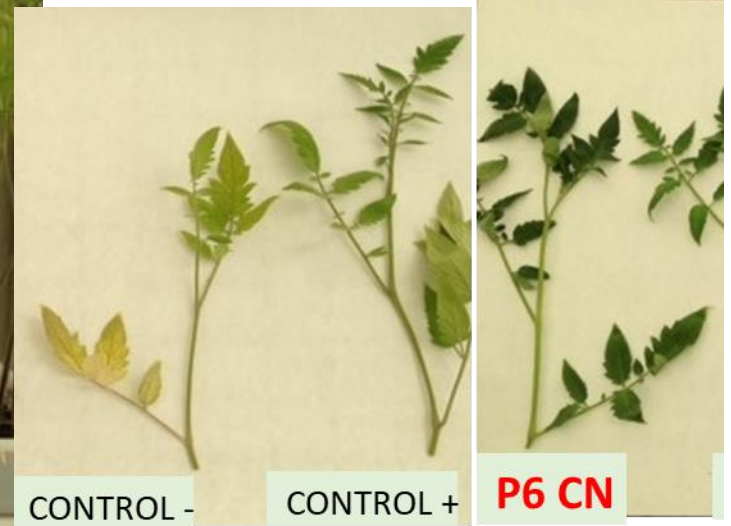

P6 CN                      CONTROL WITH Fe

CONTROL -              CONTROL +              P6 CN

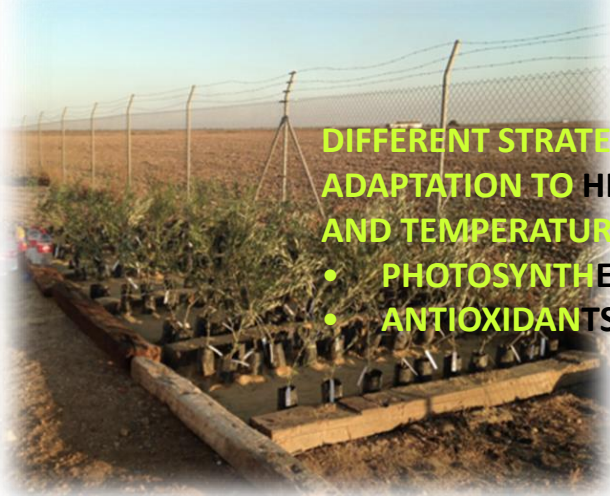

**DIFFERENT STRATEGIES TO IMPROVE PLANT ADAPTATION TO HIGH ABIOTIC STRESS (DROUGHT AND TEMPERATURE):**

- **PHOTOSYNTHETIC PIGMENTS**
- **ANTIOXIDANTS (ENZYME AND NON ENZYME)**

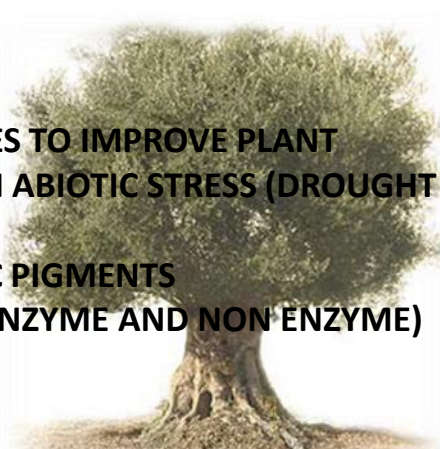

(5 strains)

**IMPROVE DROUGHT TOLERANCE & RESISTANCE TO OTHER STRESSES**

**CONTROL ROS BALANCE**

(5 strains)

|                                       |    | ANTIOXIDANTS |            | PIGMENTS   |            |
|---------------------------------------|----|--------------|------------|------------|------------|
|                                       |    | ↑ APX        | ↑ APX      | ↓ APX      | ↓ APX      |
| No pigment variation<br>(2 strains)   | K8 | ↑Flavonols   | ↓Flavonols | ↑Flavonols | ↓Flavonols |
|                                       | G7 | L44          | —          | —          | L24        |
| Lower pigment contents<br>(8 strains) |    |              |            |            |            |

F3H (Flavonol-3-hydroxylase) PLAYS A PIVOTAL ROLE ON FLAVONOID METABOLISM IMPROVING ADAPTATION TO BIOTIC STRESS IN BLACKBERRY <https://doi.org/10.1371/journal.pone.0232626>

MILDEW OUTBREAK

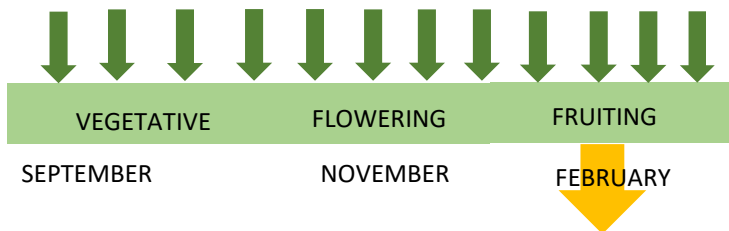

TRANSCRIPTOME  
qPCR  
TARGETED METABOLOMICS

ENHANCED  
PATHOGEN RESISTANCE  
&  
BIOACTIVE CONTENTS

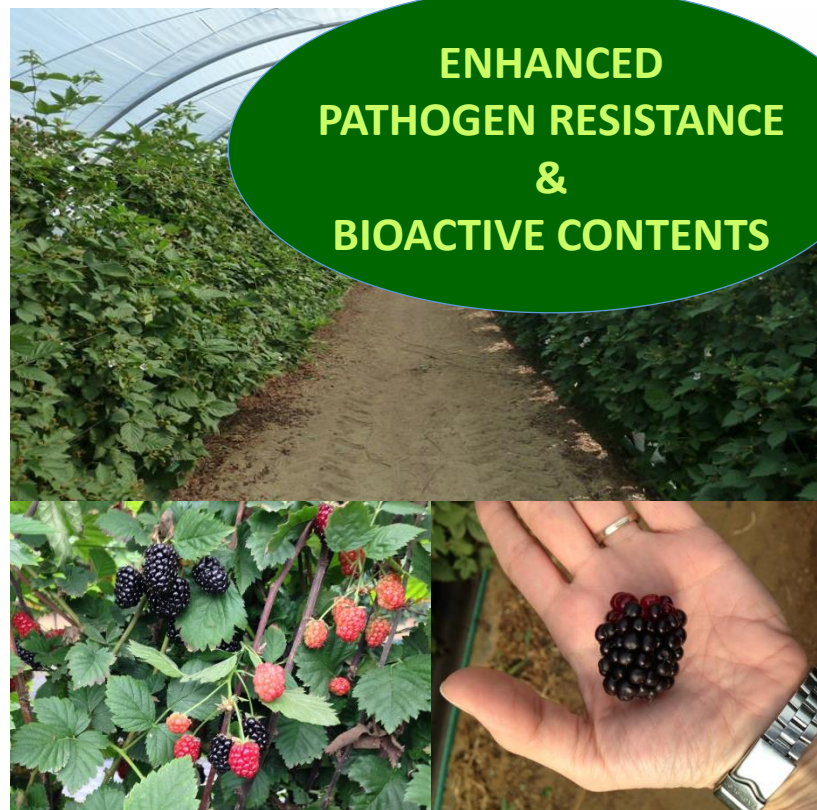

|                | Flowers/m2        | Production (Kg /plant) | Evolution of disease (%affected surface average) | Relative disease index (%) |
|----------------|-------------------|------------------------|--------------------------------------------------|----------------------------|
| <b>Control</b> | 237.95 ± 2.28 (a) | 6.2 ± 0.22 (a)         | 15% (b)                                          | 100 ± 1.05 (b)             |
| <b>QV15</b>    | 323.5 ± 1.77 (b)  | 6.4 ± 0.09 (a)         | 5% (a)                                           | 12.02 ± 0.36 (a)           |

*Bacillus amyloliquefaciens*  
PATENT P201730818

## DEFENSE REACTION BURST

**Control overexpressed genes**  
595

- **Defense related:**
- ser/thr kinases
- Fbox/FBD/LRR,
- ubiquitin ligases
- Active vacular transport
- Sugar metabolism

Commonly expressed genes  
27,866

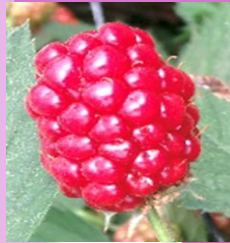

**QV15 overexpressed genes**  
664

- **Active Defense:**
- glucanases, chitinases
- **GDSL Esterases/lipases**
- Flavonoid synthesis
- Monoterpene synthesis

**SETTLED DEFENSE**

**CONTROL**

**MILDEW OUTBREAK**

**BACILLUS QV15**

## ACTIVE FLAVONOID BIOSYNTHESIS

**Control overexpressed genes**  
173

- Phenylpropanoid metabolism
- Flavonoid anthocyanin biosynthesis
- Sugar metabolism

Commonly expressed genes  
28,586

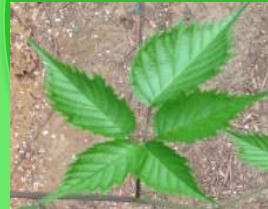

**QV15 overexpressed genes**  
367

- Photosystems I and II
- Chlorophyll biosynthesis
- SOD, APX
- Glutathione -S-transferase

**MORE PHOTOSYNTHETIC PIGMENTS**  
**LESS DESTRUCTION AND HIGHER SYNTHESIS**

**LOWER SOD AND APX ACTIVITY**  
**LESS STRESS**

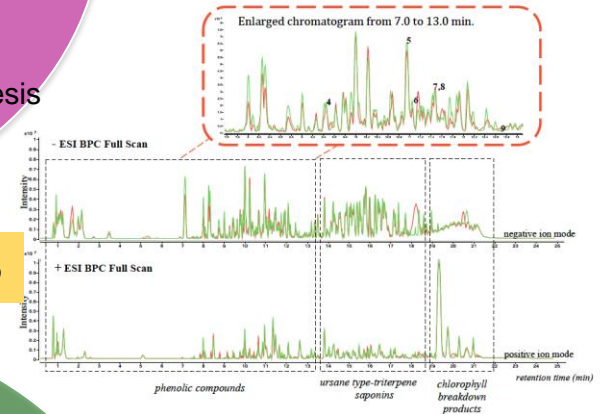



# Flavonol-anthocyanin pathway under the influence of *B.amyloliquefaciens*

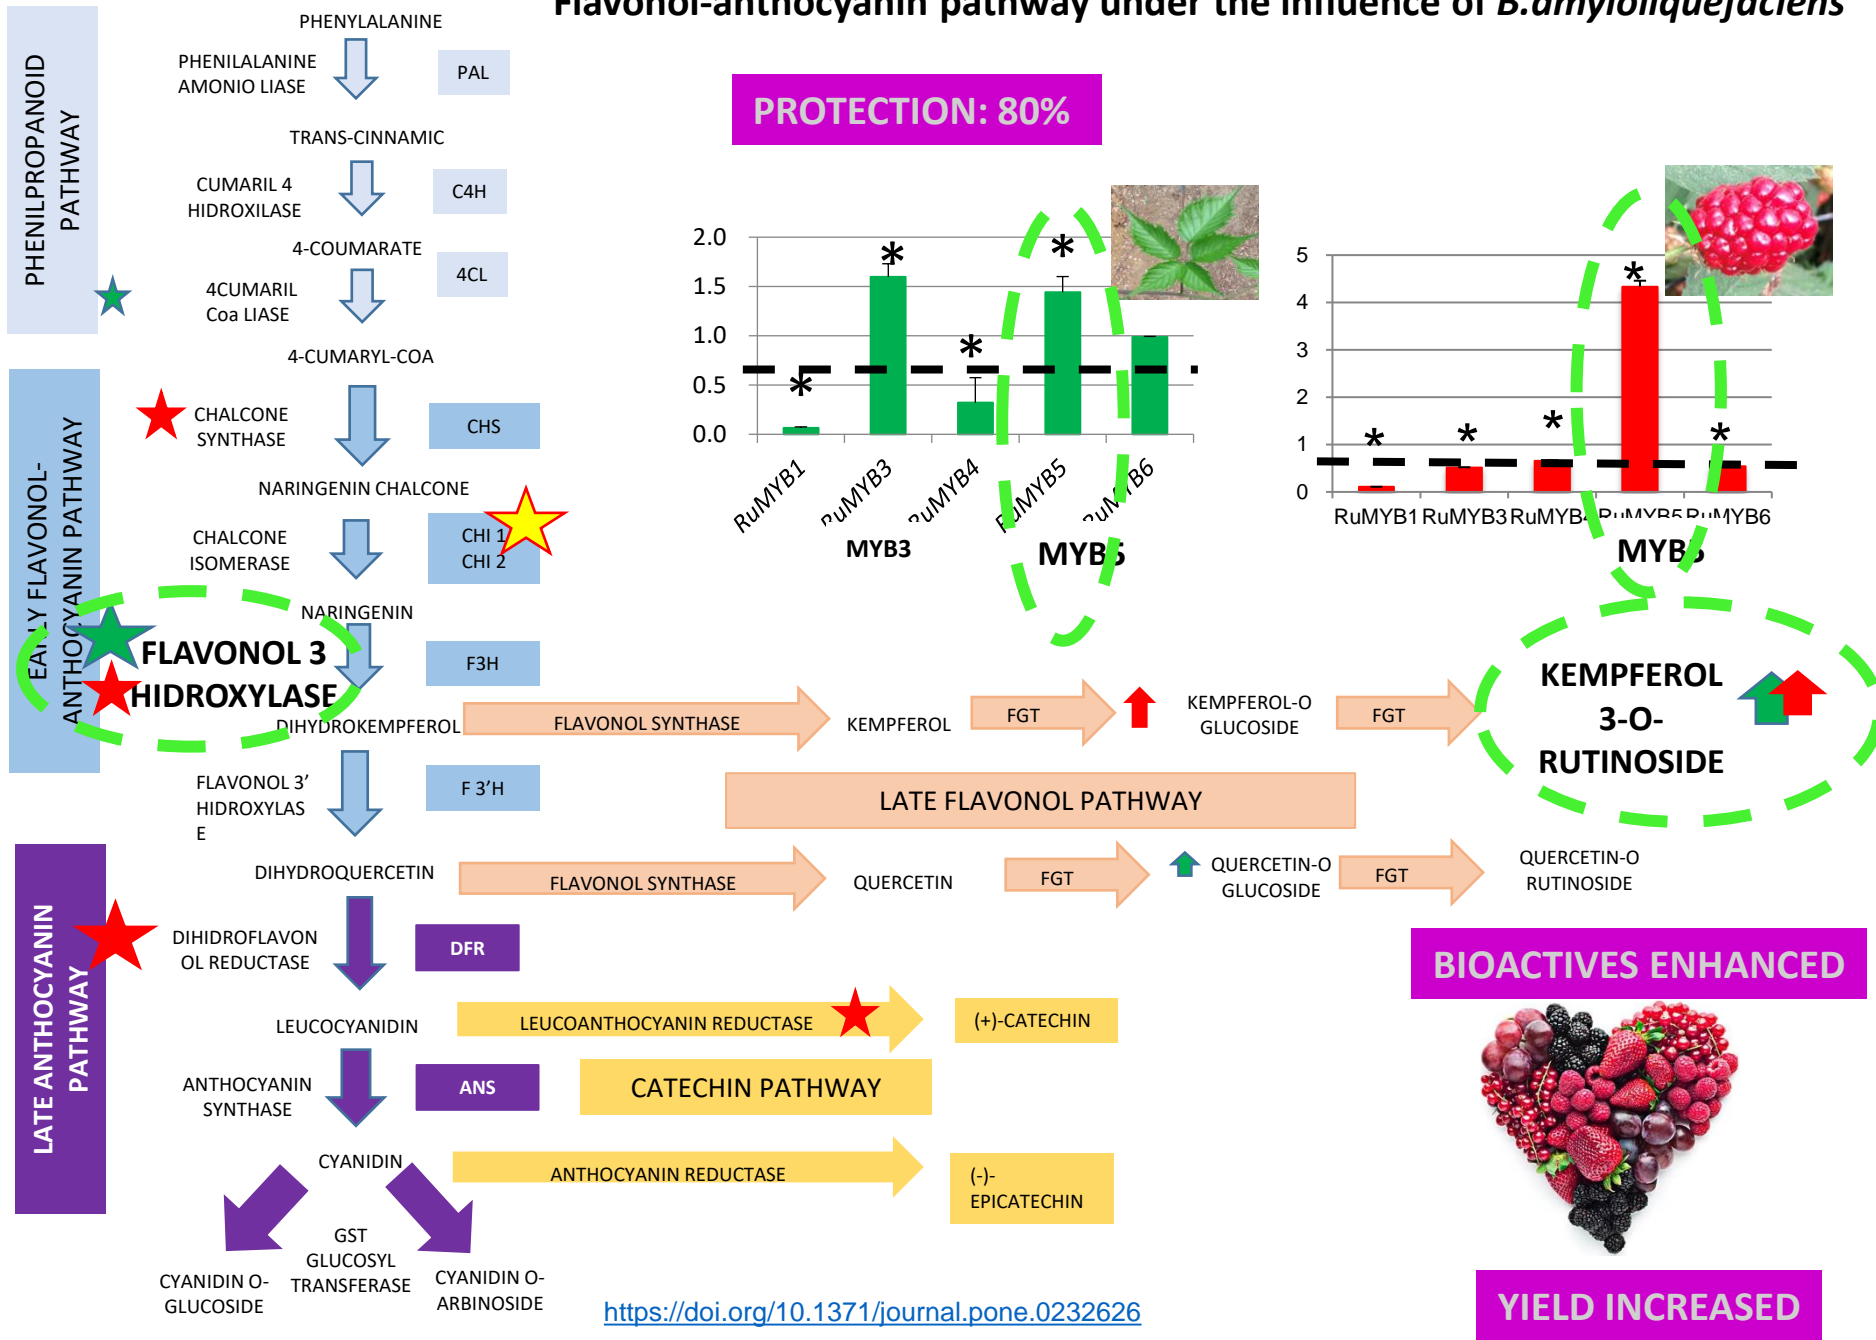

**EXPLORE  
WHAT NATURE  
DID FOR YOU**

**TAKE HOME MESSAGE**

**BENEFICIAL  
MICROORGANISMS  
SELECTED BY PLANTS  
&  
SORTED BY MEN**

**BIOFERTILIZERS**  
**TRIGGER MANY TARGETS**

**PLANT'S  
SURVIVAL  
MECHANISMS**

**IMPROVE PLANT FITNESS**  
**ROS CONTROL**

**FERTILE SOILS**

**ADVERSE CONDITIONS:  
DRY AND POOR SOILS**

**SUSTAINABILITY** **FOOD SECURITY**

**USE LESS WATER  
USE LESS CHEMICAL FERTILIZERS  
INCREASE YIELD IN SUSTAINABLE  
CONDITIONS**

**PRODUCTION IN DRY AREAS  
USE OF LOCAL SOIL NUTRIENTS  
INCREASED YIELD TO ALLOW LOCAL  
PRODUCTION**

# Acknowledgments

Project founded by Ministerio de Economía y competitividad:  
Projects of I+D+I, government research program, innovation and development orientated to  
society challenges. Reference: AGL-2013-45189-R  
Founding, Ministerio de Economía y Competitividad: BES-2014-069990

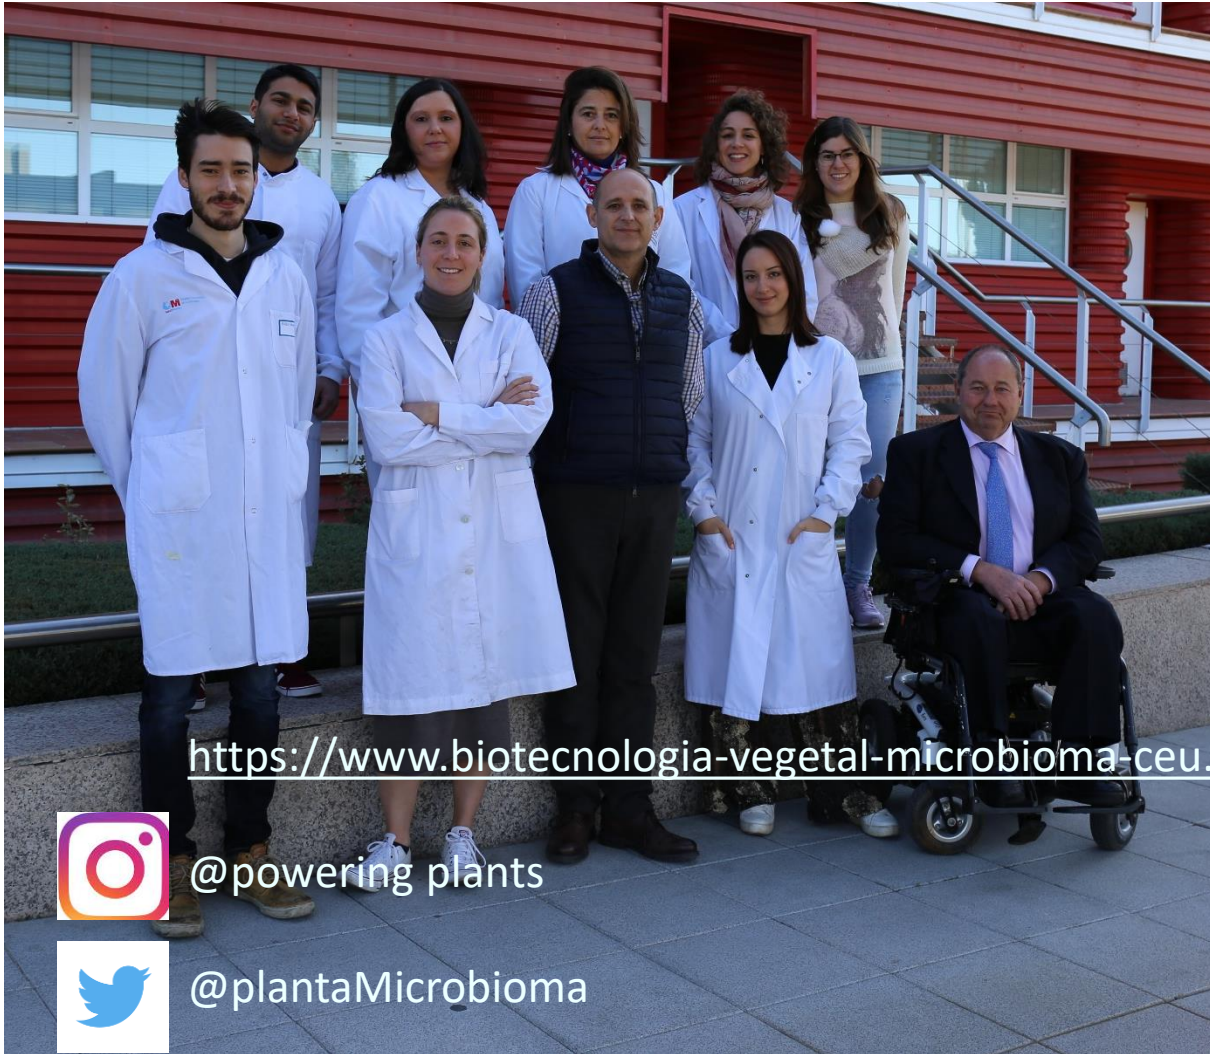

<https://www.biotecnologia-vegetal-microbioma-ceu.es/>

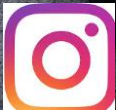

@powering plants

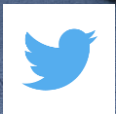

@plantaMicrobioma

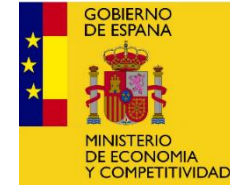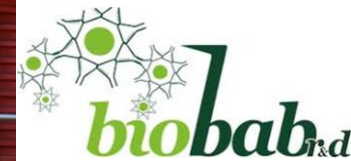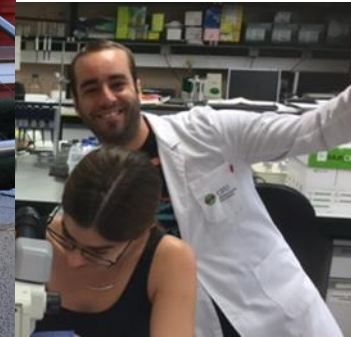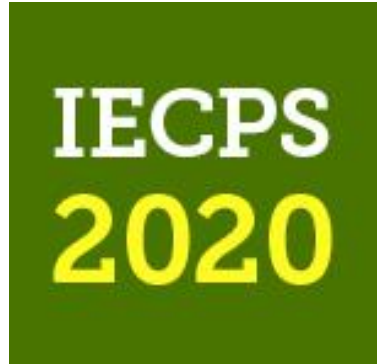

Supplement: s1 [file s1]
